# Supplementary material for: Silicon- and Boron-Induced Physio-Biochemical Alteration and Organic Acid Regulation Mitigates Aluminum Phytotoxicity in Date Palm Seedlings
Source: MDPI journal article supplement (doi:10.3390/antiox11061063), 2022-05-27
Supplement: s1 [file s1]

**Table S1.** The gene name, gene description, product size, reference number and oligonucleotide sequences used for qRT-PCR.

| Gene name            | Description                                                      | Primer sequence (5'-3')                                | Size (bp) | Accession      |
|----------------------|------------------------------------------------------------------|--------------------------------------------------------|-----------|----------------|
| <i>Lsi2</i>          | Silicon efflux transporter                                       | F: GCTTCTTCCTGCGATGCTTG<br>R: CGTCTTTGGCTGCTTGAACC     | 116       | XM_026801795.1 |
| <i>ALMT1</i>         | Phoenix dactylifera aluminum-activated malate transporter 1-like | F: CAGCATCCTTGCTCTCACAA<br>R: TATGAAGGGTCTCGCAATCC     | 105       | XM_008787669.1 |
| <i>ALMT2</i>         | Phoenix dactylifera aluminum-activated malate transporter 1-like | F: GCTCTTTGGTGGCTCTTTTG<br>R: CGAGAATATGTGGCCATTCC     | 103       | XM_026805000.1 |
| <i>PPMA1</i>         | Phoenix dactylifera plasma membrane ATPase 1                     | F: GTGGGATGACTGGAGATGGAGT<br>R: TGCACGGCTAGTTAAGACAGCA | 120       | XM_008800569.3 |
| <i>PPMA3</i>         | Phoenix dactylifera plasma membrane ATPase 3                     | F: CAGTCGTGCCATTTTTCAGA<br>R: AAAATCTCAGCCAGCTTCCA     | 118       | XM_008798430.2 |
| <i>PYL4</i>          | Absciscic acid receptor PYL4-like                                | F: CGTCGAGTCCTACGTTGTCG<br>R: GCCAGGTTCTCGGAGGTATG     | 120       | XM_008801643.3 |
| <i>PYR1</i>          | Absciscic acid receptor PYR1                                     | F: ACGGTGGTGCTGGAATCGTA<br>R: GAGGCGAGCTTCTGGAGGTT     | 110       | NW_008246541.1 |
| <i>ZEP</i>           | Zeaxanthin epoxidase                                             | F: CCACTCTTTCCTCGCCAATC<br>R: GAATCTGGCAATGGGCTTTC     | 120       | XM_008794293.2 |
| <i>Cyt-Cu/Zn SOD</i> | superoxide dismutase [Cu-Zn]-like                                | F: AAGCCTCTCTGGCCTCGAA<br>R: CACCGAGGGCATGAACATG       | 110       | XM_008791563.3 |
| <i>NCED1</i>         | 9-cis-epoxycarotenoid dioxygenase                                | F: GCCTCCTCGCACCACTATTC<br>R: CGGGTCGATGAAGTTGTTGA     | 120       | XM_008799733.3 |
| <i>NCED6</i>         | 9-cis-epoxycarotenoid dioxygenase                                | F: GCCTCCTCGCACCACTATTC<br>R: CGGGTCGATGAAGTTGTTGA     | 120       | XM_008799733.3 |
| <i>Act</i>           | Housekeeping gene actin                                          | F: TCAATGTGCCTGCCATGTATGT<br>R: GCGGCCGCTAGCATAGAG     | 62        | XM_008778129   |
